# Supplementary material for: Cisplatin liposome and 6-amino nicotinamide combination to overcome drug resistance in ovarian cancer cells
Source: PubMed Central journal article supplement (PMC5908290; doi:10.18632/oncotarget.24708), 2018-03-30
Supplement: oncotarget-09-16847-s001.pdf [file oncotarget-09-16847-s001.pdf]

## Cisplatin liposome and 6-amino nicotinamide combination to overcome drug resistance in ovarian cancer cells

### SUPPLEMENTARY MATERIALS

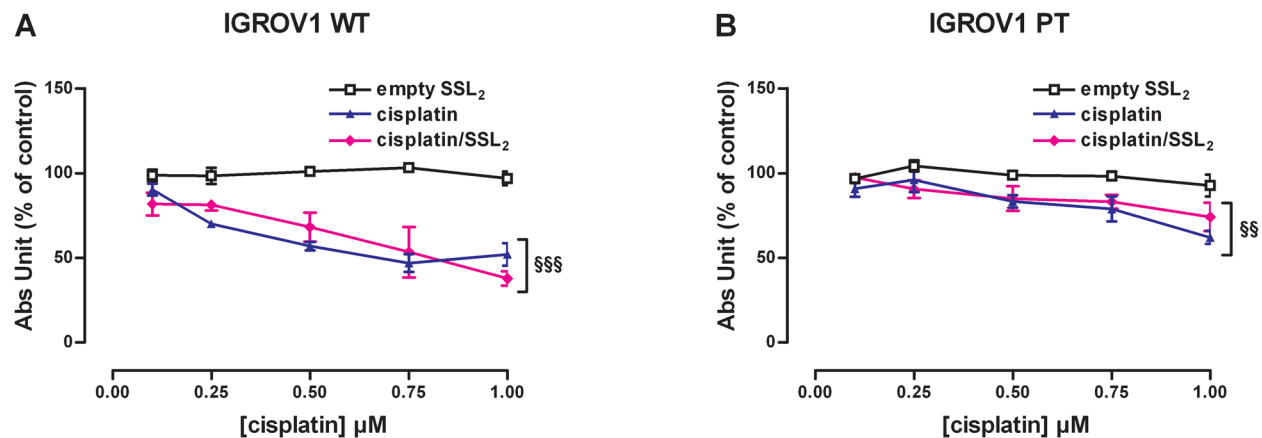

**Supplementary Figure 1: Cisplatin/SSL2 delivery does not change cisplatin effectiveness in both IGROV1 cell lines.** (A-B) Effect of cisplatin alone or delivered by SSL<sub>2</sub> liposomes (lyophilized with sucrose) in cisplatin-sensitive (A) and cisplatin-resistant (B) cells. The effect was measured after 24+48 h of treatments by SRB test. Data are the mean  $\pm$  SEM of at least 3-4 independent cultures. §§§ $p$ <0.001, §§ $p$ <0.01; treatment vs control. Data are expressed as percentage of control.

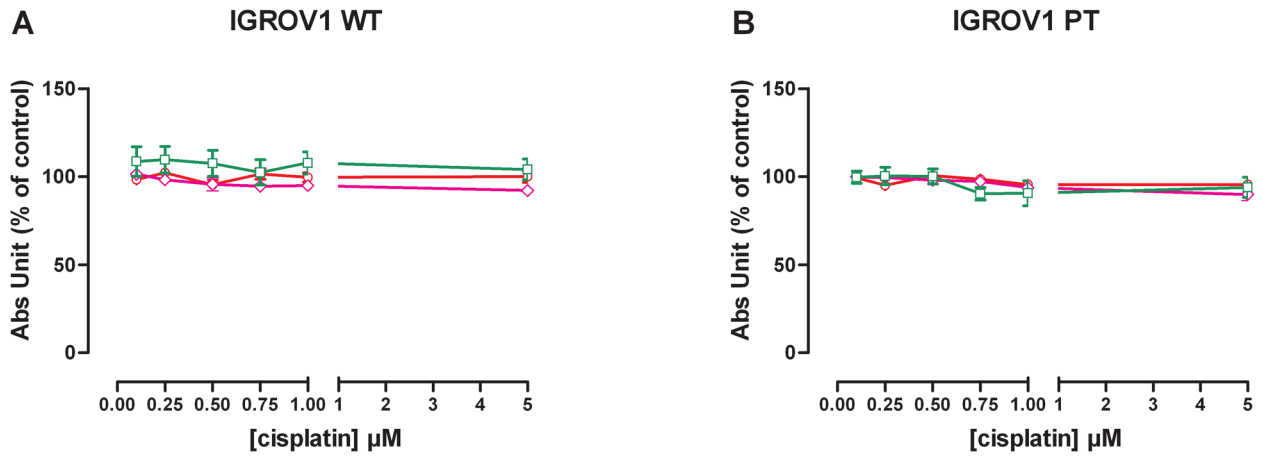

**Supplementary Figure 2: Empty liposomes do not affect IGROV1 cell viability.** (A-B) Effect of 3 different liposomal formulations (lyophilized with trehalose) in cisplatin-sensitive (A) and cisplatin-resistant (B) cells. The effect was measured after 24+48 h of treatments by SRB test. Data are the mean  $\pm$  SEM of at least 3-4 independent cultures. Data are expressed as a percentage of control.

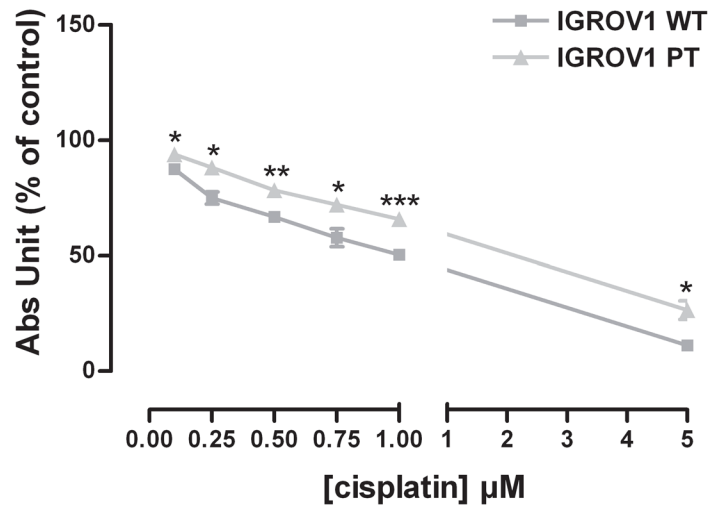

**Supplementary Figure 3: Cisplatin sensitivity in IGROV1 WT and IGROV1 PT cell lines.** Effect of cisplatin on IGROV1 cell viability. The effect was measured after 24+48 h of treatments by SRB test. Data are the mean  $\pm$  SEM of at least 4-6 independent cultures. \*\*\* $p < 0.001$ , \*\* $p < 0.01$ , \* $p < 0.05$ ; IGROV1 PT vs IGROV1 WT. Data are expressed as a percentage of control.

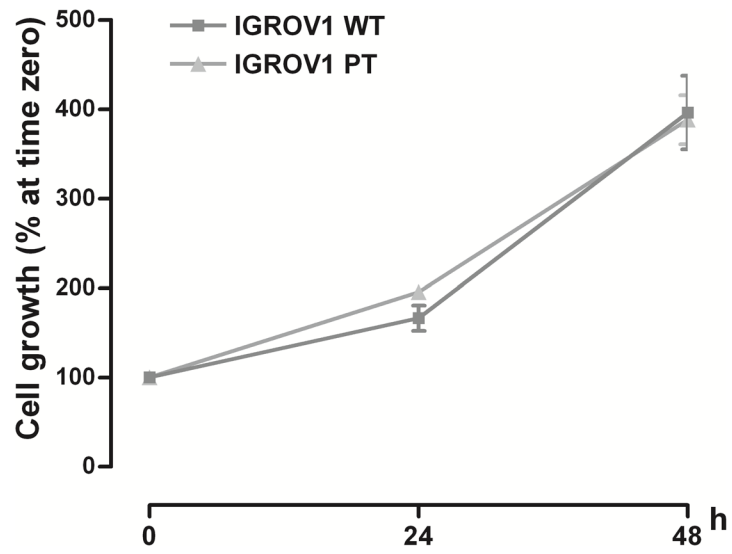

**Supplementary Figure 4: Growth kinetics curves in culture conditions.** Data are expressed as percentage of cell number compared to t0. Data are the mean  $\pm$  SEM of 3-4 independent experiments.

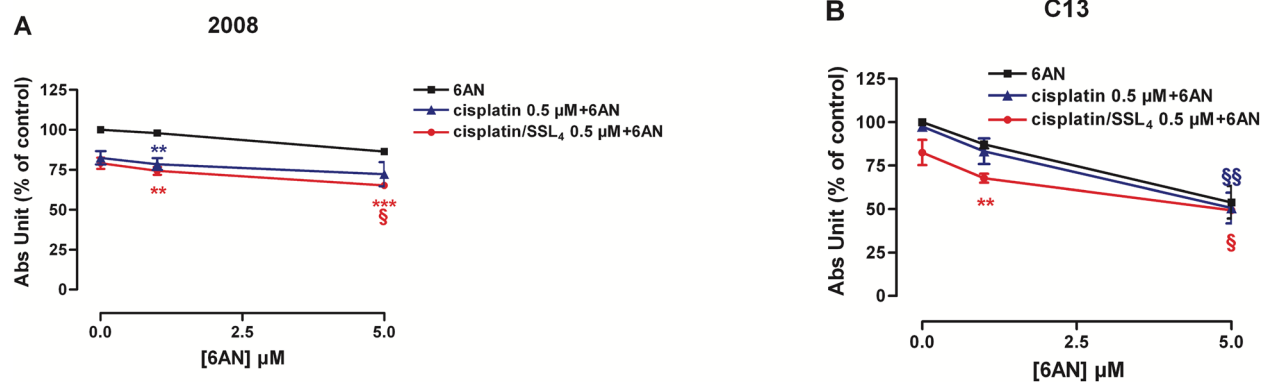

**Supplementary Figure 5: Co-treatment of 6AN and cisplatin/SSL4 increases drug activity in 2008 and C13 cells.**

(A-B) Effect of 6AN and cisplatin/SSL<sub>4</sub> association in cisplatin-sensitive (A) and cisplatin-resistant (B) cells. The effect was measured after 24+48 h of treatments by SRB test. Data are the mean  $\pm$  SEM of at least 3-4 independent cultures. \*\*\* $p$ <0.001, \*\* $p$ <0.01, \* $p$ <0.05; association vs 6AN. §§ $p$ <0.001, §§ $p$ <0.01; association vs cisplatin. Data are expressed as a percentage of control.

**Supplementary Table 1: Results of survival percentages for different experimental conditions of single drugs and drugs combinations**

|                                        | Survival (%) |           |
|----------------------------------------|--------------|-----------|
|                                        | IGROV1 WT    | IGROV1 PT |
| <b>cisplatin 0.1 <math>\mu</math>M</b> | 89.93        | 93.17     |
| <b>cisplatin 0.5 <math>\mu</math>M</b> | 68.55        | 82.36     |
| <b>cisplatin 1 <math>\mu</math>M</b>   | 53.08        | 67.54     |
| <b>6-AN 1 <math>\mu</math>M</b>        | 85.28        | 97.82     |
| <b>6-AN 5 <math>\mu</math>M</b>        | 86.30        | 97.74     |
| <b>6-AN 10 <math>\mu</math>M</b>       | 80.26        | 32.07     |
| <b>cisplatin 0.1+6-AN 1</b>            | 85.57        | 82.11     |
| <b>cisplatin 0.1+6-AN 5</b>            | 84.57        | 64.92     |
| <b>cisplatin 0.1+6-AN 10</b>           | 79.15        | 29.03     |
| <b>cisplatin 0.5+6-AN 1</b>            | 62.91        | 78.06     |
| <b>cisplatin 0.5+6-AN 5</b>            | 58.68        | 65.51     |
| <b>cisplatin 0.5+6-AN 10</b>           | 59.27        | 39.11     |
| <b>cisplatin 1+6-AN 1</b>              | 58.21        | 57.33     |
| <b>cisplatin 1+6-AN 5</b>              | 60.74        | 54.62     |
| <b>cisplatin 1+6-AN 10</b>             | 49.20        | 28.74     |

**Supplementary Table 2: Combination index of cisplatin with 6-AN in IGROV1 WT. and IGROV1 PT**

| Conc. cisplatin ( $\mu\text{M}$ ) | Conc. 6-AN ( $\mu\text{M}$ ) | IGROV1 WT |       | IGROV1 PT |       |
|-----------------------------------|------------------------------|-----------|-------|-----------|-------|
|                                   |                              | Effect    | CI    | Effect    | CI    |
| 0.1                               | 1                            | 0.856     | 1.486 | 0.82      | 0.408 |
| 0.1                               | 5                            | 0.846     | 2.599 | 0.606     | 0.5   |
| 0.1                               | 10                           | 0.728     | 0.264 | 0.29      | 0.402 |
| 0.5                               | 1                            | 0.629     | 0.776 | 0.78      | 1.007 |
| 0.5                               | 5                            | 0.604     | 0.689 | 0.655     | 0,89  |
| 0.5                               | 10                           | 0.593     | 0.654 | 0,44      | 0.71  |
| 1                                 | 1                            | 0.582     | 1.244 | 0.573     | 0.986 |
| 1                                 | 5                            | 0.607     | 1.398 | 0.546     | 0.813 |
| 1                                 | 10                           | 0.492     | 0.829 | 0.287     | 0,495 |

**Supplementary Table 3: IC50 values of cisplatin and cisplatin/SSL4s**

|           | IC50 ( $\mu\text{M}$ ) |                            |
|-----------|------------------------|----------------------------|
|           | cisplatin              | cisplatin/SSL <sub>4</sub> |
| IGROV1 WT | 2.34                   | 2.87                       |
| IGROV1 PT | 3.18                   | 3.25                       |
